# Supplementary material
Source: MDPI journal article supplement (https://www.mdpi.com/2073-4433/13/5/786)
Supplement: s1 [file s1]

Support information

# Transformation and migrant mechanism of sulfur and nitrogen during chemical looping combustion with $\text{CuFe}_2\text{O}_4$

Haichuan Li , Ziheng Han , Chenye Hu , Jingjing Ma \* and Qingjie Guo \*

*State Key Laboratory of High-efficiency Utilization of Coal and Green Chemical Engineering, College of Chemistry and Chemical Engineering, Ningxia University, Yinchuan, 750021, China*

\* Corresponding author: [majingjing@nxu.edu.cn](mailto:majingjing@nxu.edu.cn) (J.M.); [qingjie\\_guo@nxu.edu.cn](mailto:qingjie_guo@nxu.edu.cn) (Q.G.) Fax/Tel.: +86-951-2062323 (J.M.; Q.G.)

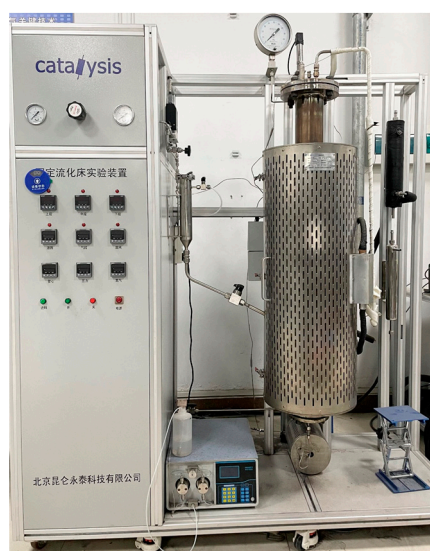

Figure S1. The fluidized bed reactor used in experiment

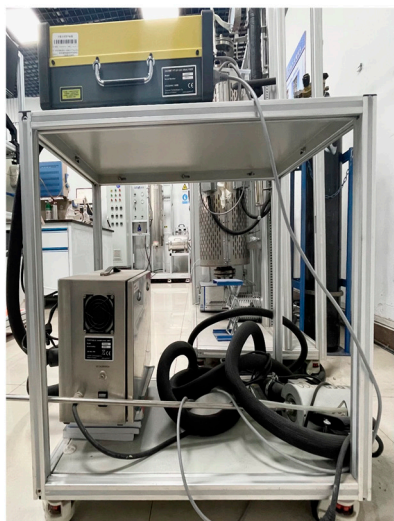

**(a)**

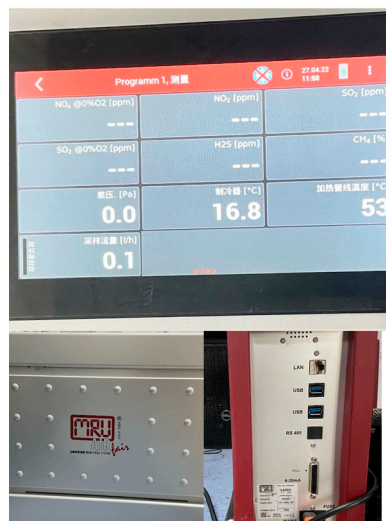

**(b)**

Figure S2 (a) Gasmet gas analyzer (b) VARIO Plus MRU gas analyzer
